# Supplementary material for: Preoperative Glycosylated Haemoglobin Screening to Identify Older Adult Patients with Undiagnosed Diabetes Mellitus—A Retrospective Cohort Study
Source: MDPI journal article supplement (doi:10.3390/jpm14020219), 2024-02-19
Supplement: s1 [file s1]

## Supplementary tables

*Table S1: Comparison of demographic, clinical and surgical characteristics between patients with and without a recent HbA1c.*

| Characteristic                   | No recent HbA1c (n = 836) | Recent HbA1c (n = 697) | p       |
|----------------------------------|---------------------------|------------------------|---------|
| <b>Age, years</b>                | 73 (6)                    | 73 (6)                 | 0.027   |
| <b>Sex, female, n</b>            | 479 (57.3%)               | 323 (46.3%)            | < 0.001 |
| <b>BMI, kg m<sup>-2</sup></b>    | 26 (5)                    | 26 (4)                 | 0.048   |
| <b>ASA score, n</b>              |                           |                        |         |
| <b>1 or 2</b>                    | 496 (59.3%)               | 473 (67.9%)            | < 0.001 |
| <b>≥ 3</b>                       | 340 (40.7%)               | 224 (32.1%)            | < 0.001 |
| <b>Maximum MET, n</b>            |                           |                        |         |
| <b>&lt; 7</b>                    | 327 (44.7%)               | 240 (39.5%)            | 0.059   |
| <b>≥ 7</b>                       | 405 (55.3%)               | 367 (60.5%)            | 0.101   |
| <b>Cardiovascular history, n</b> |                           |                        |         |
| <b>HT</b>                        | 363 (43.4%)               | 317 (45.5%)            | 0.42    |
| <b>IHD</b>                       | 136 (16.3%)               | 96 (13.8%)             | 0.18    |
| <b>CVA/TIA</b>                   | 84 (10.0%)                | 76 (10.9%)             | 0.59    |
| <b>PVD</b>                       | 26 (3.1%)                 | 25 (3.6%)              | 0.60    |
| <b>Surgical specialty, n</b>     |                           |                        |         |
| <b>Gynaecology</b>               | 171 (20.5%)               | 49 (7.0%)              | < 0.001 |
| <b>Gastrointestinal</b>          | 121 (14.5%)               | 95 (13.6%)             | 0.636   |
| <b>Orthopaedic</b>               | 52 (6.2%)                 | 106 (15.2%)            | < 0.001 |
| <b>Urology</b>                   | 77 (9.2%)                 | 62 (8.9%)              | 0.831   |
| <b>Neurosurgery</b>              | 71 (8.5%)                 | 37 (5.3%)              | 0.015   |
| <b>Other</b>                     | 344 (41.1%)               | 349 (49.9%)            | < 0.001 |
| <b>Surgical risk, n</b>          |                           |                        |         |
| <b>Minor</b>                     | 421 (50.4%)               | 418 (60.0%)            | < 0.001 |
| <b>Moderate</b>                  | 275 (32.9%)               | 220 (31.6%)            | 0.579   |
| <b>Major</b>                     | 140 (16.7%)               | 59 (8.5%)              | < 0.001 |
| <b>Anaesthesia type, n</b>       |                           |                        |         |
| <b>General</b>                   | 696 (83.4%)               | 594 (85.3%)            | 0.293   |
| <b>Neuraxial</b>                 | 23 (2.8%)                 | 36 (5.2%)              | 0.014   |
| <b>PNB</b>                       | 14 (1.7%)                 | 24 (3.4%)              | 0.027   |
| <b>Sedation</b>                  | 102 (12.2%)               | 42 (6.0%)              | < 0.001 |

Values are number (proportion) or mean (SD). HT, hypertension; IHD, ischemic heart disease; CVA/TIA, cerebrovascular accident and/or transient ischaemic attack; MET, metabolic equivalent of task; PNB, peripheral nerve block; PVD, peripheral vascular disease.

*Table S2: Other observational studies reporting on the association between HbA1c and postoperative outcome in (a subgroup of) patients without a diagnosis of diabetes.*

|                           | Type                                                       | Population*                                     | Postoperative outcome                                                                                                                                                                                                                                         |
|---------------------------|------------------------------------------------------------|-------------------------------------------------|---------------------------------------------------------------------------------------------------------------------------------------------------------------------------------------------------------------------------------------------------------------|
| <b>Gustafsson (2009)</b>  | Prospective                                                | N = 120<br>Age: 31-90<br>Colorectal surgery     | HbA1c > 43 was associated with a higher rate of 30-day overall complications (OR 2.9 [95%CI 1.1-7.9]; p = 0.037)                                                                                                                                              |
| <b>Walid (2010)</b>       | Retrospective                                              | N = 383 (442)<br>Age: 21-92<br>Spine surgery    | HbA1c ≥ 43 was associated with increased LOS (7.0 (5.9) vs 4.7 (2.5) days; p < 0.05) and higher total cost in 1 of 3 subgroups (lumbar decompression and fusion).                                                                                             |
| <b>Hudson (2010)</b>      | Retrospective                                              | N = 1615<br>Age: 65 (11)<br>Cardiac surgery     | Increased 30-day mortality (OR 1.53 per 11 mmol.mol <sup>-1</sup> HbA1c increase [95%CI 1.24-1.91]; p < 0.001); HbA1c > 43 was associated with an increased rate of AKI (OR 1.148 [95%CI 1.003-1.313]; p = 0.04). No association between HbA1c and infection. |
| <b>Iavazzo (2015)</b>     | Prospective                                                | N = 266<br>Age: unknown<br>Gynaecologic surgery | No association between HbA1c and rate of complications or 30-day readmissions                                                                                                                                                                                 |
| <b>Gatti (2017)</b>       | Prospective<br>(E-CABG registry)                           | N = 1384<br>Age: 68 (9)<br>Cardiac surgery      | HbA1c > 44 was an independent predictor of sternal wound infections (OR 2.23 [95%CI 1.17-4.2]; p = 0.012)                                                                                                                                                     |
| <b>Narayan (2017)</b>     | Retrospective                                              | N = 1633<br>Age: 59 (9)<br>Cardiac surgery      | No association between HbA1c and complications or 30-day mortality                                                                                                                                                                                            |
| <b>Nicolini (2018)</b>    | Prospective<br>(E-CABG registry)                           | N = 1664<br>Age: 68 (9)<br>Cardiac surgery      | HbA1c > 53 was associated with a higher rate of stroke (adjusted OR 5.68 [95%CI 1.74-18.57]; p < 0.001) and prolonged inotropic support (adjusted OR 1.88 [95%CI 1.17-3.03]; p = 0.01)                                                                        |
| <b>Kocogullari (2018)</b> | Retrospective                                              | N = 202<br>Age: 33-82<br>Cardiac surgery        | HbA1c ≥ 38 was associated with a higher rate of AKI (adjusted OR 11.17 [95%CI 2.21-56.33]; p = 0.003)                                                                                                                                                         |
| <b>Arya (2018)</b>        | Retrospective<br>(Veterans Health Administration database) | N = 10,746<br>Age: 66 (9)<br>Vascular surgery   | Higher rate of amputation (HR 1.49 [95%CI 1.06-2.11] for HbA1c 54-64 vs. < 42; HR 1.98 [95%CI 1.51-2.59] for HbA1c > 64 vs. < 42). Higher rate of modified major adverse limb events (HR 1.19 [95%CI 0.95-1.48] for HbA1c                                     |

|                       |                                             |                                                                                                     |                                                                                                                                                            |
|-----------------------|---------------------------------------------|-----------------------------------------------------------------------------------------------------|------------------------------------------------------------------------------------------------------------------------------------------------------------|
|                       |                                             |                                                                                                     | 54-64 vs. < 42; HR 1.52 [95%CI 1.25-1.84] for<br>HbA1c > 64 vs. < 42)                                                                                      |
| <b>Wysocki (2019)</b> | Retrospective                               | N = 1375<br>Age: 41 (35-51)<br>Bariatric surgery                                                    | No association between HbA1c and<br>postoperative morbidity, prolonged LOS or<br>hospital readmission                                                      |
| <b>Lam (2022)</b>     | Prospective (UK<br>Biobank cohort<br>study) | N = 26,653<br>Age: 58 (8) (HbA1c < 42)<br>61 (7) (HbA1c ≥ 42)<br>Cardiac and non-cardiac<br>surgery | HbA1c ≥ 42 was associated with a higher rate<br>of the composite endpoint of 30-day major<br>postoperative complications and 90-day<br>all-cause mortality |

---

Values are mean (SD) or median (Q1-Q3).

\* If the study sample also included patients with a diagnosis of diabetes, the total sample size is shown between brackets. Only the outcome data of patients without a history of diabetes are shown.

AKI, Acute Kidney Injury; CABG, Coronary Artery Bypass Grafting; CPB, cardiopulmonary bypass; PAD, peripheral arterial disease; HbA1c, glycosylated haemoglobin (mmol.mol<sup>-1</sup>).
